# Supplementary material
Source: PubMed Central journal article supplement (PMC5678048)
Supplement: halms1350891-supplement_1.pdf [file halms1350891-supplement_1.pdf]

**Supplemental Table 1. Oligodeoxyribonucleotide primer sequences for qPCR**

| Name of gene | Forward sequence           | Reverse sequence            |
|--------------|----------------------------|-----------------------------|
| Acaca        | TGGCAGACCACTATGTTCCA       | GAGCAGTTCTGGGAGTTTCG        |
| Agt          | TTCACTGCTCCAGGCTTTCGTCTA   | TTCTCAGTGGCAAGAACTGGGTCA    |
| aSma         | GTCCCAGACATCAGGGAGTAA      | TCGGATACTTCAGCGTCAGGA       |
| Cdh1         | CTCCAGTCATAGGGAGCTGTC      | TCTTCTGAGACCTGGGTACAC       |
| Chrebp       | CTG GGG ACC TAA ACA GGA GC | GAA GCC ACC CTA TAG CTC CC  |
| Ctnnb1       | GTGCAATTCCTGAGCTGACA       | CTTAAAGATGGCCAGCAAGC        |
| Fasn         | TTCCAAGACGAAAATGATGC       | AATTGTGGGATCAGGAGAGC        |
| Fibronectin  | TGGCTGCCTTCAACTTCTCCT      | TGTTTGATCTGGACTGGCAGTTT     |
| Hmgcr        | TCTGTTGTGAACCATGTGACTTC    | AGCTTGCCCGAATTGTATGTG       |
| Hmgcs2       | CCGTATGGGCTTCTGTTTCCAG     | AGCTTTGTGCGTTCCATCAG        |
| L19          | AGAAGATTGACCGCCATAT        | TTCGTGCTTCCTTGGTCTTAGA      |
| Nphs2        | GGGCATCAAAGTGGAGAGAACTG    | TGGACAGCGACTGAAGAGTGTG      |
| Pai1         | TTCAGCCCTTGCTTGCCTC        | ACACTTTTACTCCGAAGTCGGT      |
| Podxl        | GAGCACAGCGAGCCATCC         | GTGGAGACGGGCAATGTAG         |
| Scd1         | TGGGTTGGCTGCTTGTG          | GCGTGGGCAGGATGAAG           |
| Srebf1       | GGCACTAAGTGCCCTCAACCT      | GCCACATAGATCTCTGCCAGTGT     |
| Srebf2       | GCAGCAACGGGACCATTCT        | CCCCATGACTAAGTCCTTCAACT     |
| Synpo        | CATCGGACCTTCTTCCCTGTG      | TCGGAGTCTGTGGGTGAG          |
| Tgfb1        | CAACAATTCCTGGCGTTACCTTGG   | GAAAGCCCTGTATTCCGTCTCCTT    |
| Tnf          | AGGCTGCCCCGACTACGT         | GACTTTCTCCTGGTATGAGATAGCAAA |
| Vim          | CGGCTGCGAGAGAAATTGC        | CCACTTTCGGTTCAAGGTCAAG      |
| Zo1          | GCCGCTAAGAGCACAGCAA        | TCCCCACTCTGAAAATGAGGA       |

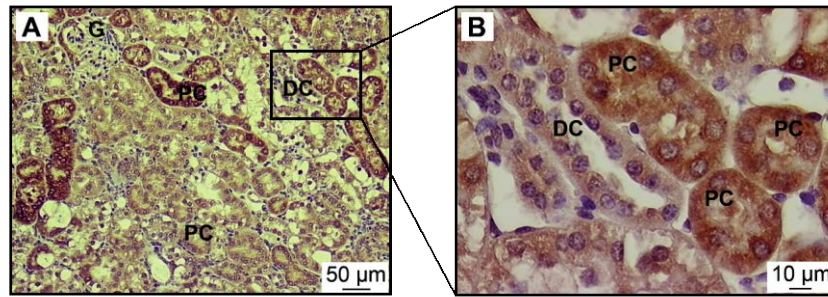

**Supplemental Figure 1: Identification of G6PC positive cells in K-G6pc<sup>-/-</sup> kidneys.**

A-B. Immunohistochemical analyses of G6PC in the kidneys of K-G6pc<sup>-/-</sup> mice. Panel B corresponds to a higher magnification of the G6PC positive cells observed in panel A. The G6PC positive cells were identified as proximal convoluted tubules by the presence of brush border that reduces the luminal space of the tubule. G: glomeruli, DC: distal convoluted tubules, PC: proximal convoluted tubules.
